# Supplementary figures and images for: Utilizing decavanadate as an artificial solid electrolyte interface to effectively suppress dendrite formation on a lithium metal anode
Source: Royal Society of Chemistry journal article supplement (doi:10.1039/d4qi03139c), 2025-01-01

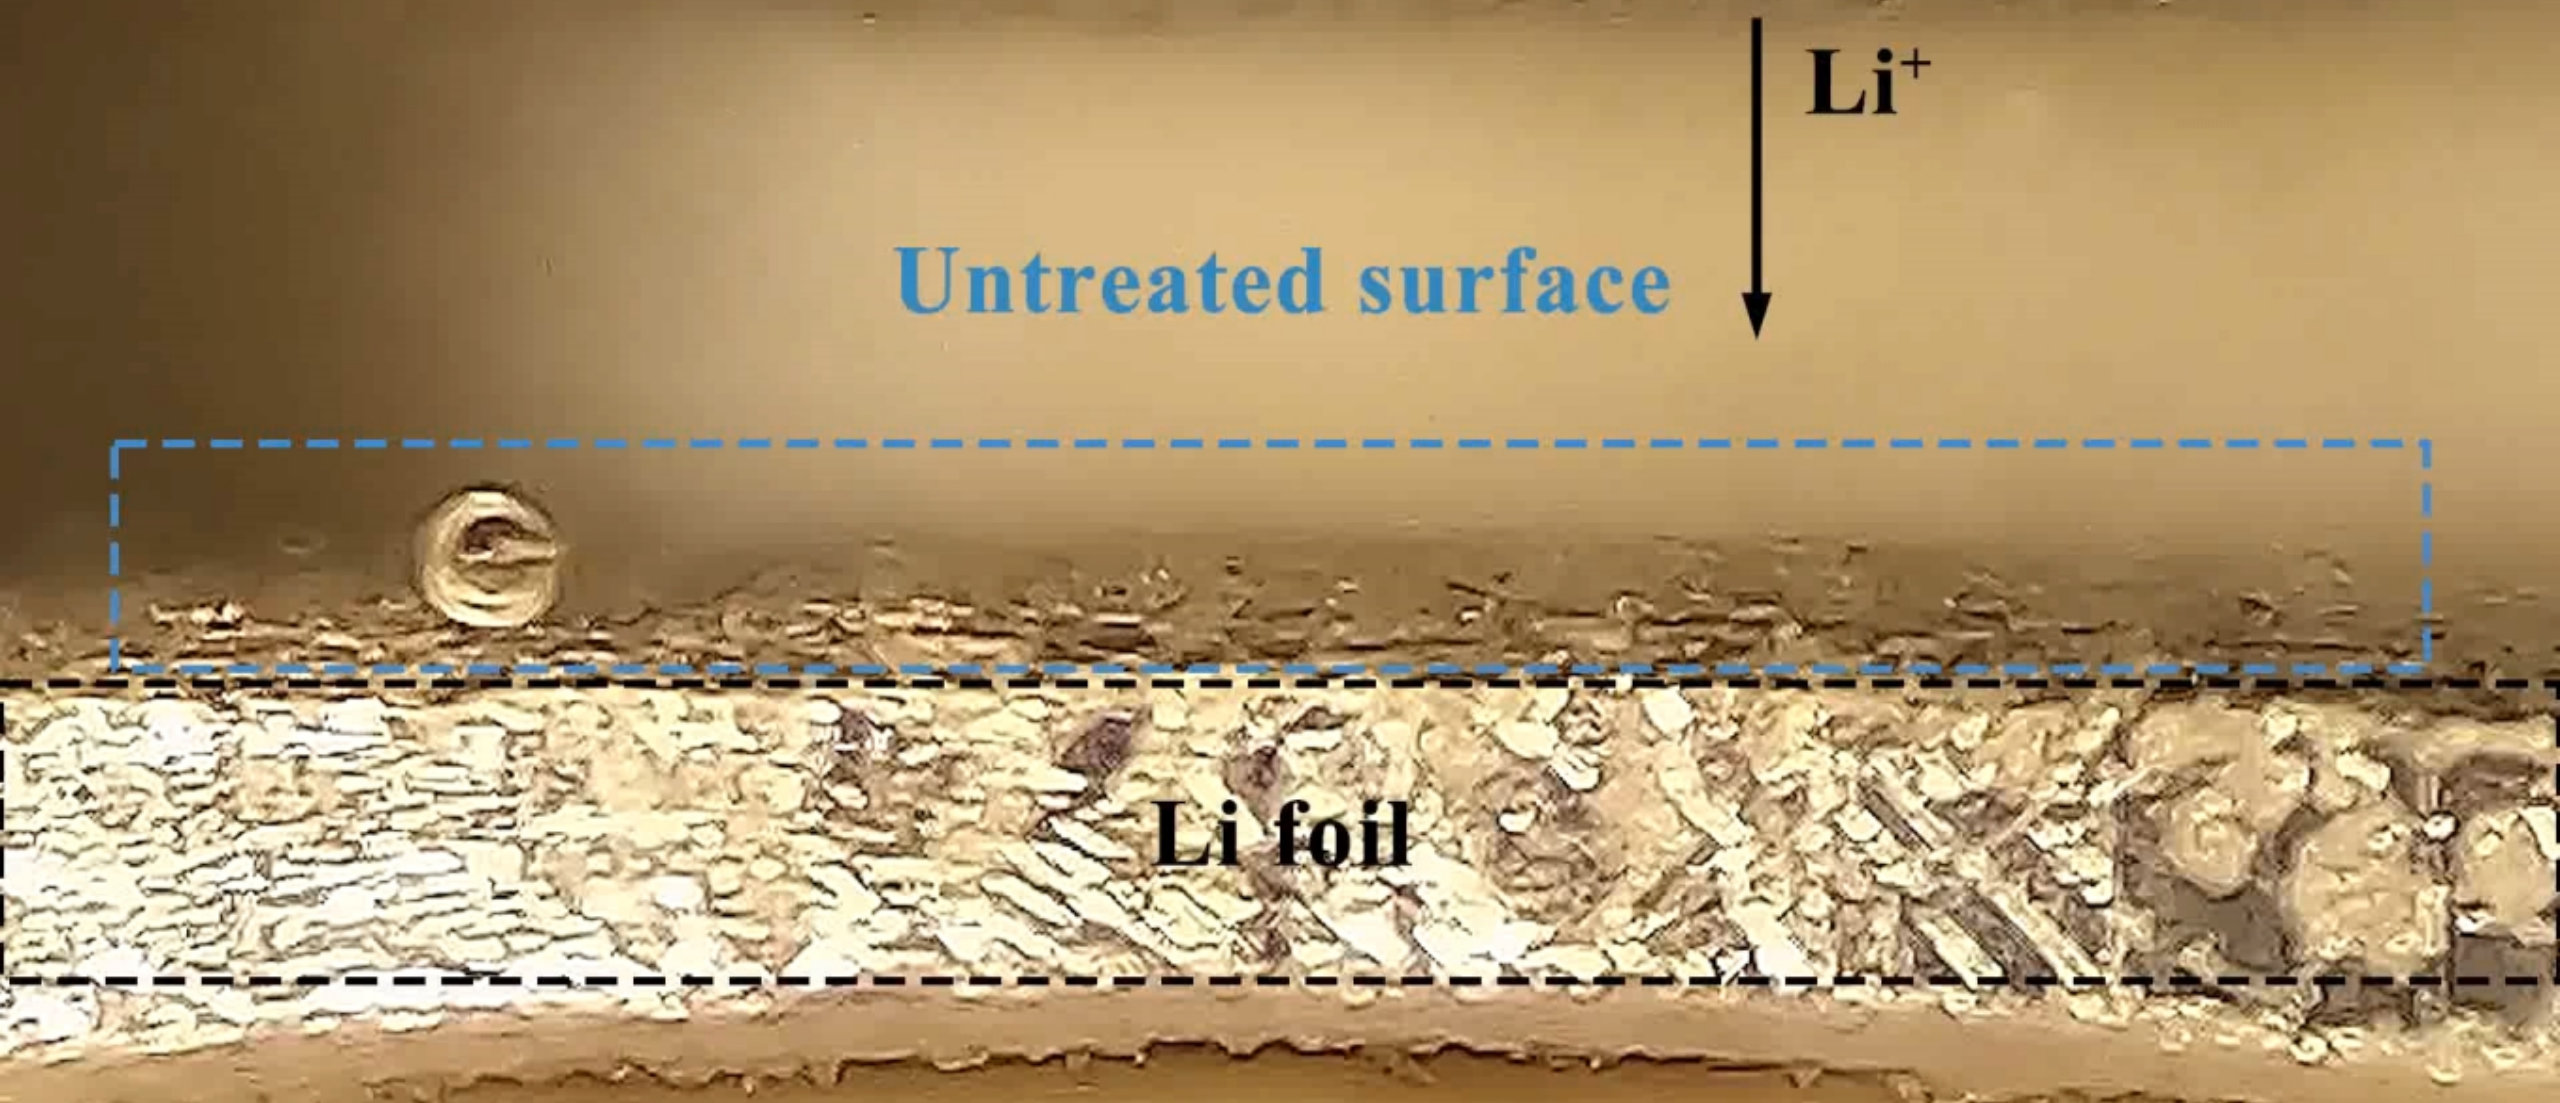

00:00:13:45

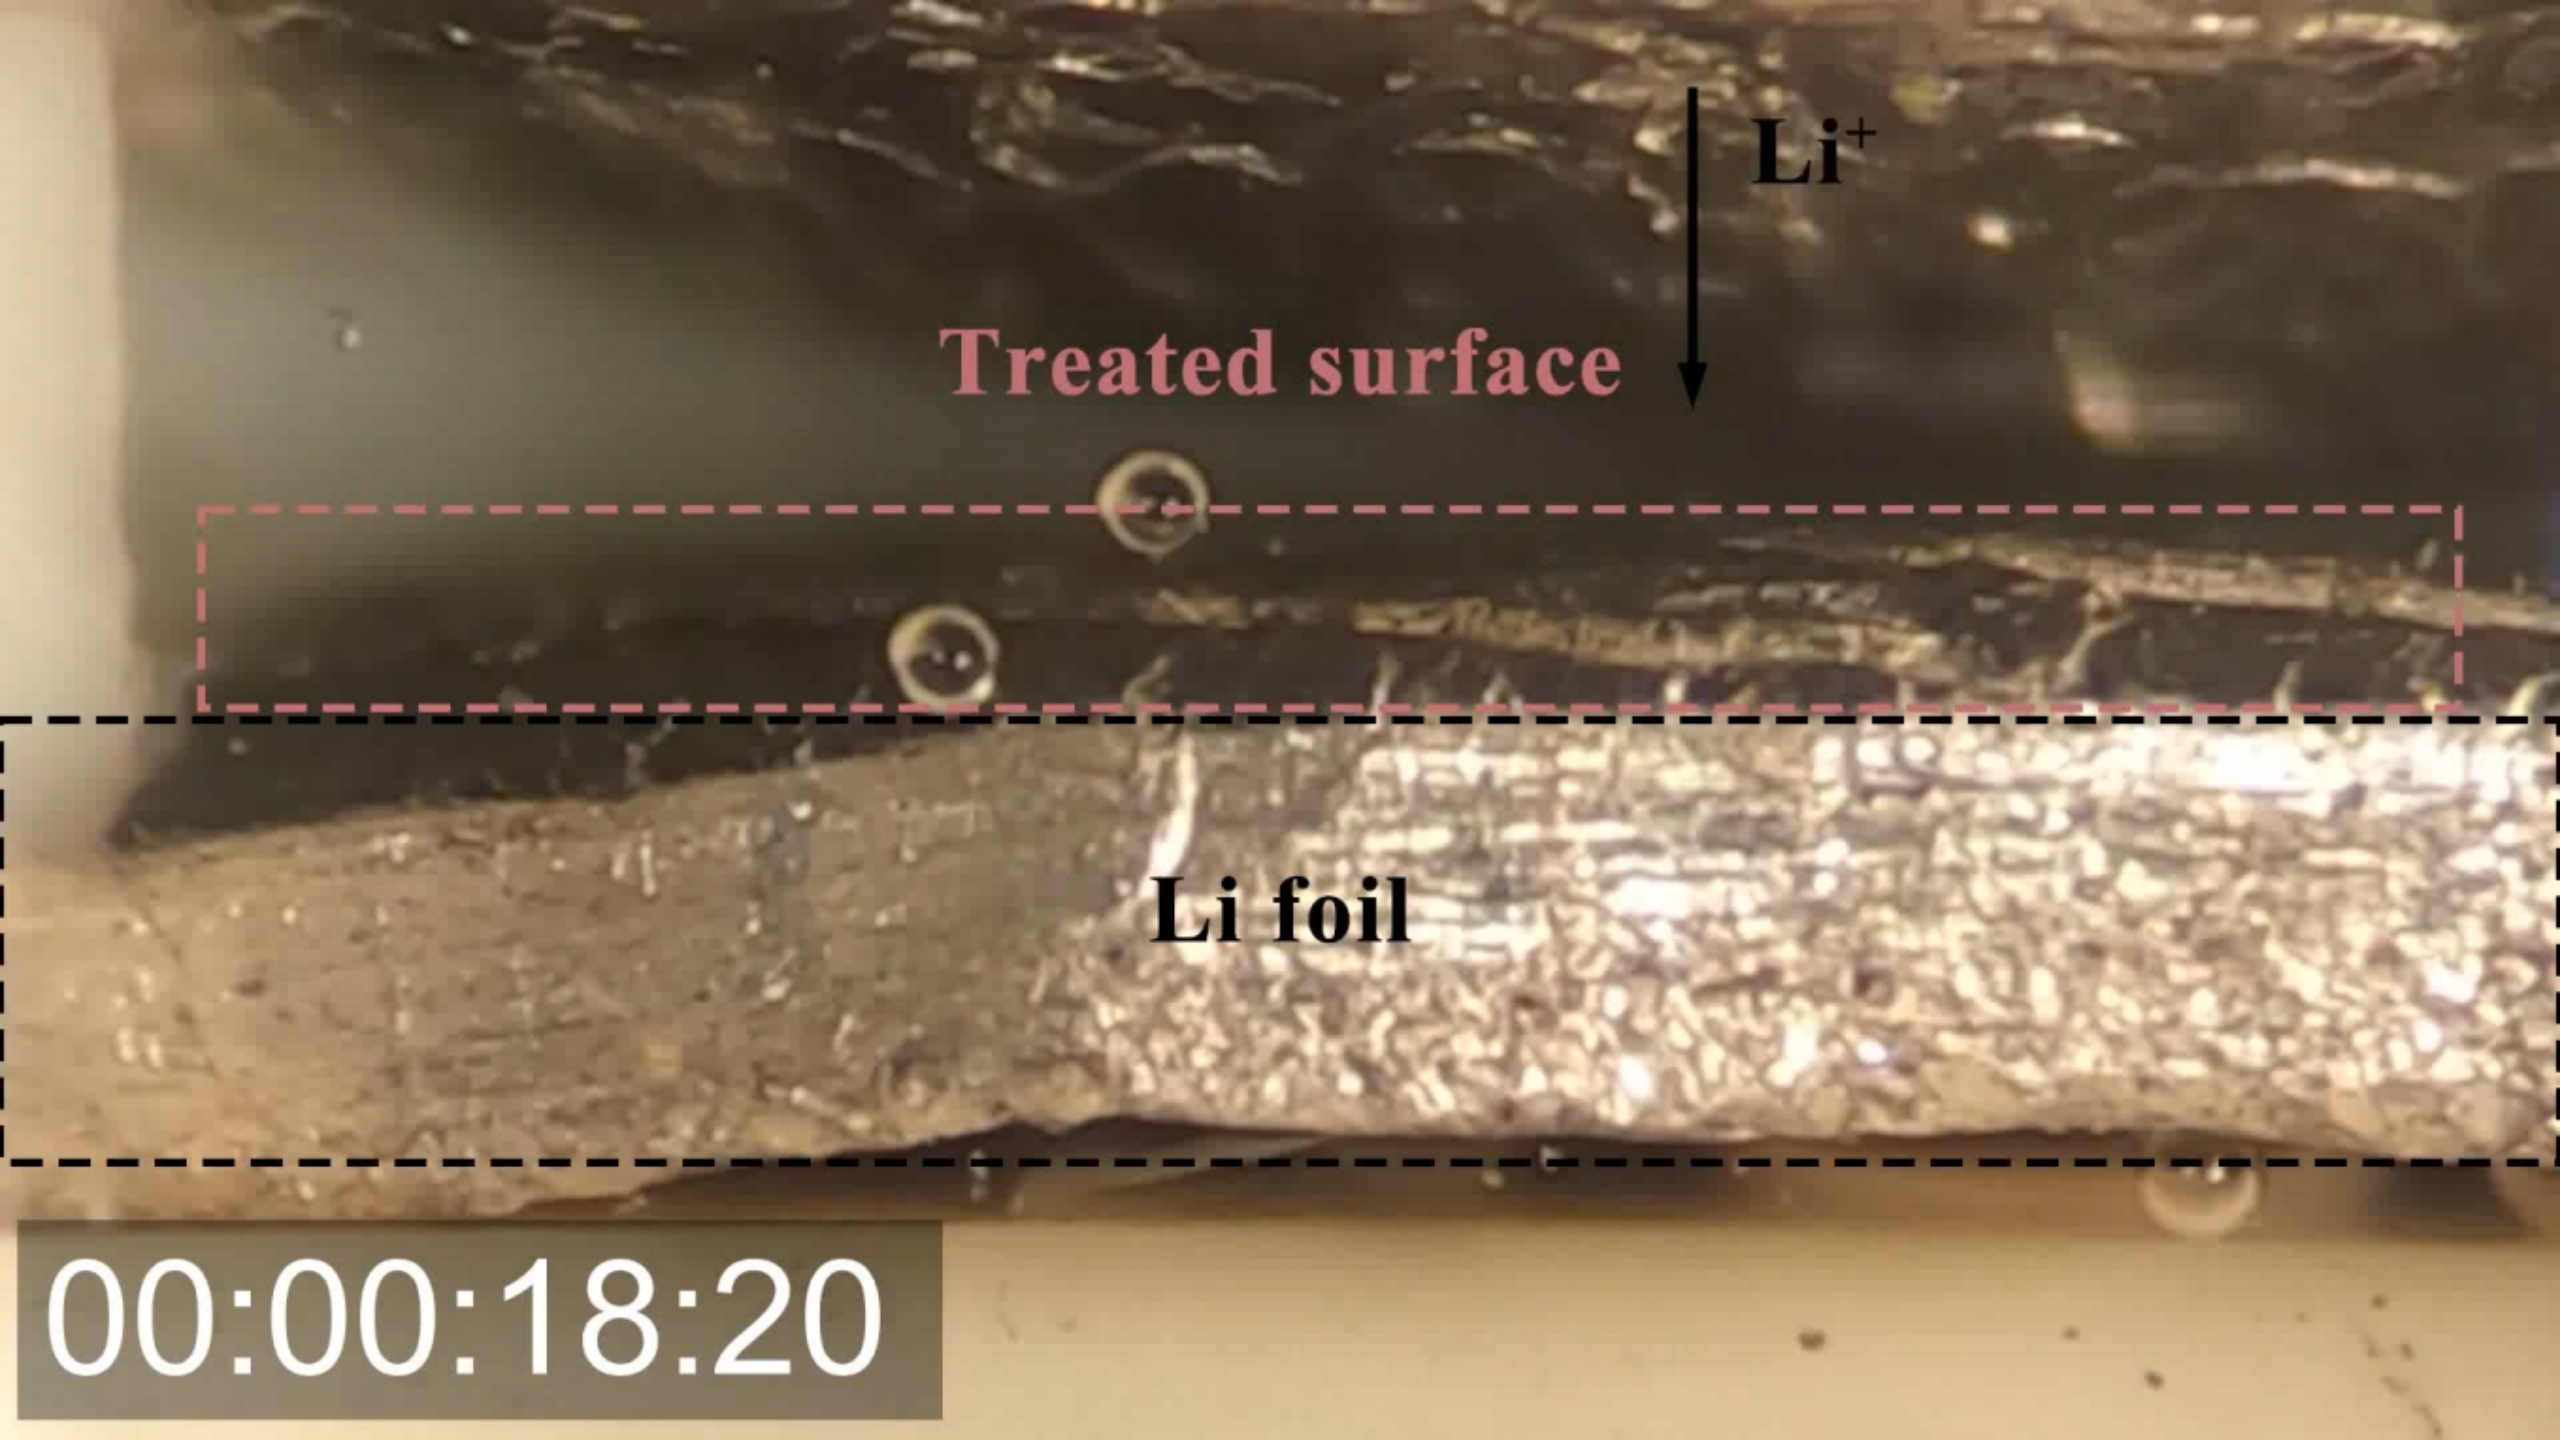

**Treated surface**

**Li<sup>+</sup>**

**Li foil**

00:00:18:20

Supplement: d4qi03139c1.pdf [file d4qi03139c1.pdf]
